# Supplementary material for: A solution to minimum sample size for regressions
Source: PLoS One. 2020 Feb 21;15(2):e0229345. doi: 10.1371/journal.pone.0229345 (PMC7034864; doi:10.1371/journal.pone.0229345)
Supplement: S1 Data — (XLS) [file pone.0229345.s004.xls]

## Sheet: med or epidem
Number	Sample size	Citation, from search using ["meta-analysis" "meta-regression"] and medical or epidemiology
1	3	Tersmette AC, Giardiello FM, Offerhaus JA, et al. Geographical variance in the risk of gastric stump cancer: no increased risk in Japan? Jpn J Cancer Res 1991;82:266-72.
2	3	Vincent GM, Janowski M, Menlove R. Protamine allergy reactions during cardiac catheterization and cardiac surgery: risk in patients taking protamine-insulin preparations. Cathet Cardiovasc Diagn 1991;23:164-8.
3	4	Tersmette AC, Giardiello FM, Offerhaus JA, et al. Geographical variance in the risk of gastric stump cancer: no increased risk in Japan? Jpn J Cancer Res 1991;82:266-72.
4	5	Carlquist JF, Menlove RL, Murray MB, et al. HLA Class II (DR and DQ) antigen associations in idiopathic dilated cardiomyopathy. Validation study and meta-analysis of published HLA association studies. Circulation 1991;83:515-22.
5	5	Longnecker MP, Martin-Moreno JM, Knekt P, et al. Serum alpha-tocopherol concentration in relation to subsequent colorectal cancer: pooled data from five cohorts. J Natl Cancer Inst 1992;18:430-5.
6	5	Bahekar, A. A., Singh, S., Saha, S., Molnar, J., & Arora, R. (2007). The prevalence and incidence of coronary heart disease is significantly increased in periodontitis: a meta-analysis. American heart journal, 154(5), 830-837.
7	5	Bahekar, A. A., Singh, S., Saha, S., Molnar, J., & Arora, R. (2007). The prevalence and incidence of coronary heart disease is significantly increased in periodontitis: a meta-analysis. American heart journal, 154(5), 830-837.
8	6	Bagnardi, V., Zatonski, W., Scotti, L., La Vecchia, C., & Corrao, G. (2008). Does drinking pattern modify the effect of alcohol on the risk of coronary heart disease? Evidence from a meta-analysis. Journal of Epidemiology & Community Health, 62(7), 615-619.
9	8	Zhang, M. W., Ho, R. C., Cheung, M. W., Fu, E., & Mak, A. (2011). Prevalence of depressive symptoms in patients with chronic obstructive pulmonary disease: a systematic review, meta-analysis and meta-regression. General hospital psychiatry, 33(3), 217-223.
10	8	Arbyn, M., Bergeron, C., Klinkhamer, P., Martin-Hirsch, P., Siebers, A. G., & Bulten, J. (2008). Liquid compared with conventional cervical cytology: a systematic review and meta-analysis. Obstetrics & Gynecology, 111(1), 167-177.
11	8	Warner E, Lockwood G, Tritchler D, et al. The risk of breast cancer associated with mammographic parenchymal patterns: a meta-analysis of the published literature to examine the effect of method of classification. Cancer Detect Prev 1992; 16:67-72.
12	8	Jess, T., Rungoe, C., & Peyrin–Biroulet, L. (2012). Risk of colorectal cancer in patients with ulcerative colitis: a meta-analysis of population-based cohort studies. Clinical gastroenterology and hepatology, 10(6), 639-645.
13	9	Baraniak, A., & Sheffield, D. (2011). The efficacy of psychologically based interventions to improve anxiety, depression and quality of life in COPD: a systematic review and meta-analysis. Patient education and counseling, 83(1), 29-36.
14	9	Fleiss JL, Gross AJ. Meta-analysis in epidemiology, with special reference to studies of the association between exposure to environmental tobacco smoke and lung cancer: a critique. J Clin Epidemiol 1991;44:127-39.
15	9	Duricova, D., Pedersen, N., Elkjaer, M., Gamborg, M., Munkholm, P., & Jess, T. (2009). Overall and cause-specific mortality in Crohn's disease: a meta-analysis of population-based studies. Inflammatory bowel diseases, 16(2), 347-353.
16	10	Costanzo, S., Di Castelnuovo, A., Donati, M. B., Iacoviello, L., & De Gaetano, G. (2011). Wine, beer or spirit drinking in relation to fatal and non-fatal cardiovascular events: a meta-analysis. European journal of epidemiology, 26(11), 833-850.
17	11	Larsson, S. C., & Orsini, N. (2011). Coffee consumption and risk of stroke: a dose-response meta-analysis of prospective studies. American Journal of Epidemiology, 174(9), 993-1001.
18	11	Larsson, S. C., & Wolk, A. (2007). Coffee consumption and risk of liver cancer: a meta-analysis. Gastroenterology, 132(5), 1740-1745.
19	11	Murawski, B., Wade, L., Plotnikoff, R. C., Lubans, D. R., & Duncan, M. J. (2018). A systematic review and meta-analysis of cognitive and behavioral interventions to improve sleep health in adults without sleep disorders. Sleep medicine reviews, 40, 160-169.
20	11	Jafar, T. H., Stark, P. C., Schmid, C. H., Landa, M., Maschio, G., De Jong, P. E., ... & Levey, A. S. (2003). Progression of chronic kidney disease: the role of blood pressure control, proteinuria, and angiotensin-converting enzyme inhibition: a patient-level meta-analysis. Annals of internal medicine, 139(4), 244-252.
21	11	Myers MG, Basinski A Coffee and coronary heart disease. Arch Intern Med 1992;152:1767-72.
22	11	Warner E, Lockwood G, Tritchler D, et al. The risk of breast cancer associated with mammographic parenchymal patterns: a meta-analysis of the published literature to examine the effect of method of classification. Cancer Detect Prev 1992; 16:67-72.
23	11	Jones, L., Bellis, M. A., Wood, S., Hughes, K., McCoy, E., Eckley, L., ... & Officer, A. (2012). Prevalence and risk of violence against children with disabilities: a systematic review and meta-analysis of observational studies. The Lancet, 380(9845), 899-907.
24	12	Bischoff-Ferrari HA, Willett WC, Wong JB, et al. Fracture prevention with vitamin D supplementation: a meta-analysis of randomized controlled trials. JAMA. 2005;293:2257-64.
25	12	Howe GR, Hirohata T, Hislop TG, et al. (1990). Dietary factors and risk of breast cancer: combined analysis of 12 case-controlled studies. J Natl Cancer Inst. 82, 561-569.
26	12	Whittemore AS, Harris R, Itnyre J. Characteristics relating to ovarian cancer risk: collaborative analysis of 12 US case-control studies, n. Invasive epithelial ovarian cancers in white women. Am J Epidemiol 1992;136:1184-203.
27	12	Costanzo, S., Di Castelnuovo, A., Donati, M. B., Iacoviello, L., & De Gaetano, G. (2011). Wine, beer or spirit drinking in relation to fatal and non-fatal cardiovascular events: a meta-analysis. European journal of epidemiology, 26(11), 833-850.
28	12	Gao, X., LaValley, M. P., & Tucker, K. L. (2005). Prospective studies of dairy product and calcium intakes and prostate cancer risk: a meta-analysis. Journal of the National Cancer Institute, 97(23), 1768-1777.
29	13	Sofi, F., Conti, A. A., Gori, A. M., Luisi, M. L. E., Casini, A., Abbate, R., & Gensini, G. F. (2007). Coffee consumption and risk of coronary heart disease: a meta-analysis. Nutrition, Metabolism and Cardiovascular Diseases, 17(3), 209-223.
30	13	Fernandes, B. S., Gama, C. S., Ceresér, K. M., Yatham, L. N., Fries, G. R., Colpo, G., ... & Kapczinski, F. (2011). Brain-derived neurotrophic factor as a state-marker of mood episodes in bipolar disorders: a systematic review and meta-regression analysis. Journal of psychiatric research, 45(8), 995-1004.
31	13	Costanzo, S., Di Castelnuovo, A., Donati, M. B., Iacoviello, L., & De Gaetano, G. (2011). Wine, beer or spirit drinking in relation to fatal and non-fatal cardiovascular events: a meta-analysis. European journal of epidemiology, 26(11), 833-850.
32	13	Salas, M. M. S., Nascimento, G. G., Vargas-Ferreira, F., Tarquinio, S. B. C., Huysmans, M. C. D. N. J. M., & Demarco, F. F. (2015). Diet influenced tooth erosion prevalence in children and adolescents: Results of a meta-analysis and meta-regression. Journal of dentistry, 43(8), 865-875.
33	14	Bravi, F., Bosetti, C., Tavani, A., Gallus, S., & La Vecchia, C. (2013). Coffee reduces risk for hepatocellular carcinoma: an updated meta-analysis. Clinical gastroenterology and hepatology, 11(11), 1413-1421.
34	14	Lawlor, D. A., & Hopker, S. W. (2001). The effectiveness of exercise as an intervention in the management of depression: systematic review and meta-regression analysis of randomised controlled trials. Bmj, 322(7289), 763.
35	16	Trock B, Lanza E, Greenwald P. (1990). Dietary fiber, vegetables, and colon cancer: critical review and meta-analyses of epidemiologic evidence. J Natl Cancer Inst 82, 650-661.
36	16	Costanzo, S., Di Castelnuovo, A., Donati, M. B., Iacoviello, L., & De Gaetano, G. (2011). Wine, beer or spirit drinking in relation to fatal and non-fatal cardiovascular events: a meta-analysis. European journal of epidemiology, 26(11), 833-850.
37	16	Shiga, T., Wajima, Z. I., & Ohe, Y. (2008). Is operative delay associated with increased mortality of hip fracture patients? Systematic review, meta-analysis, and meta-regression. Canadian Journal of Anesthesia, 55(3), 146.
38	16	Jones, L., Bellis, M. A., Wood, S., Hughes, K., McCoy, E., Eckley, L., ... & Officer, A. (2012). Prevalence and risk of violence against children with disabilities: a systematic review and meta-analysis of observational studies. The Lancet, 380(9845), 899-907.
39	17	Gillies, C. L., Abrams, K. R., Lambert, P. C., Cooper, N. J., Sutton, A. J., Hsu, R. T., & Khunti, K. (2007). Pharmacological and lifestyle interventions to prevent or delay type 2 diabetes in people with impaired glucose tolerance: systematic review and meta-analysis. Bmj, 334(7588), 299.
40	17	Gilbody, S., Richards, D., Brealey, S., & Hewitt, C. (2007). Screening for depression in medical settings with the Patient Health Questionnaire (PHQ): a diagnostic meta-analysis. Journal of general internal medicine, 22(11), 1596-1602.
41	17	Giles, E. L., Robalino, S., McColl, E., Sniehotta, F. F., & Adams, J. (2014). The effectiveness of financial incentives for health behaviour change: systematic review and meta-analysis. PloS one, 9(3), e90347.
42	18	Shaikh, N., Morone, N. E., Bost, J. E., & Farrell, M. H. (2008). Prevalence of urinary tract infection in childhood: a meta-analysis. The Pediatric infectious disease journal, 27(4), 302-308.
43	18	Sofi, F., Abbate, R., Gensini, G. F., & Casini, A. (2010). Accruing evidence on benefits of adherence to the Mediterranean diet on health: an updated systematic review and meta-analysis. The American journal of clinical nutrition, 92(5), 1189-1196.
44	18	Ma L, Boyd NF. Atypical hyperplasia and breast cancer risk: a critique. Cancer Causes Control 1992;3:517-25.
45	18	Stuck, A. E., Egger, M., Hammer, A., Minder, C. E., & Beck, J. C. (2002). Home visits to prevent nursing home admission and functional decline in elderly people: systematic review and meta-regression analysis. Jama, 287(8), 1022-1028.
46	19	Kondo, N., Sembajwe, G., Kawachi, I., van Dam, R. M., Subramanian, S. V., & Yamagata, Z. (2009). Income inequality, mortality, and self rated health: meta-analysis of multilevel studies. Bmj, 339, b4471.
47	20	Tersmette AC, Giardiello FM, Offerhaus JA, et al. Geographical variance in the risk of gastric stump cancer: no increased risk in Japan? Jpn J Cancer Res 1991;82:266-72.
48	20	Hankinson SE, Colditz GA, Hunter DJ, et al. A quantitative assessment of oral contraceptive use and risk of ovarian cancer. Obstet Gynecol 1992;80:708-14.
49	21	Renehan, A. G., Zwahlen, M., Minder, C., T O'Dwyer, S., Shalet, S. M., & Egger, M. (2004). Insulin-like growth factor (IGF)-I, IGF binding protein-3, and cancer risk: systematic review and meta-regression analysis. The Lancet, 363(9418), 1346-1353.
50	24	Doth, A. H., Hansson, P. T., Jensen, M. P., & Taylor, R. S. (2010). The burden of neuropathic pain: a systematic review and meta-analysis of health utilities. Pain®, 149(2), 338-344.
51	24	Song, D. Y., Song, S., Song, Y., & Lee, J. E. (2012). Alcohol intake and renal cell cancer risk: a meta-analysis. British journal of cancer, 106(11), 1881.
52	25	Virués-Ortega, J. (2010). Applied behavior analytic intervention for autism in early childhood: Meta-analysis, meta-regression and dose–response meta-analysis of multiple outcomes. Clinical psychology review, 30(4), 387-399.
53	26	Griesdale, D. E., de Souza, R. J., van Dam, R. M., Heyland, D. K., Cook, D. J., Malhotra, A., ... & Talmor, D. (2009). Intensive insulin therapy and mortality among critically ill patients: a meta-analysis including NICE-SUGAR study data. Cmaj, 180(8), 821-827.
54	26	Patra, J., Taylor, B., Irving, H., Roerecke, M., Baliunas, D., Mohapatra, S., & Rehm, J. (2010). Alcohol consumption and the risk of morbidity and mortality for different stroke types-a systematic review and meta-analysis. BMC public health, 10(1), 258.
55	27	Taylor, N., Conner, M., & Lawton, R. (2012). The impact of theory on the effectiveness of worksite physical activity interventions: a meta-analysis and meta-regression. Health Psychology Review, 6(1), 33-73.
56	28	Ellis, S. E., Speroff, T., Dittus, R. S., Brown, A., Pichert, J. W., & Elasy, T. A. (2004). Diabetes patient education: a meta-analysis and meta-regression. Patient education and counseling, 52(1), 97-105.
57	28	He, F. J., & MacGregor, G. A. (2002). Effect of modest salt reduction on blood pressure: a meta-analysis of randomized trials. Implications for public health. Journal of human hypertension, 16(11), 761.
58	31	Seretny, M., Currie, G. L., Sena, E. S., Ramnarine, S., Grant, R., MacLeod, M. R., ... & Fallon, M. (2014). Incidence, prevalence, and predictors of chemotherapy-induced peripheral neuropathy: a systematic review and meta-analysis. PAIN®, 155(12), 2461-2470.
59	31	Stampfer MJ, Colditz GA. Estrogen replacement therapy and coronary heart disease: a quantitative assessment of the epidemiologic evidence. Prev Med 1991;20:47-63.
60	33	Law MR, Thompson SG. Low serum cholesterol and the risk of cancer: an analysis of the published prospective studies. Cancer Causes Control 1991;2:253-61.
61	33	Piskulic, D., Olver, J. S., Norman, T. R., & Maruff, P. (2007). Behavioural studies of spatial working memory dysfunction in schizophrenia: a quantitative literature review. Psychiatry research, 150(2), 111-121.
62	34	Cape, J., Whittington, C., Buszewicz, M., Wallace, P., & Underwood, L. (2010). Brief psychological therapies for anxiety and depression in primary care: meta-analysis and meta-regression. BMC medicine, 8(1), 38.
63	34	Bollini P, Garcia Rodriguez LA, P6rez Gutthann S, et al. The impact of research quality and study design on epidemiologic estimates of the effect of nonsteroidal anti-inflammatory drugs on upper gastrointestinal tract disease. Arch Intern Med 1992; 152:1289-95.
64	34	Gellatly, J., Bower, P., Hennessy, S., Richards, D., Gilbody, S., & Lovell, K. (2007). What makes self-help interventions effective in the management of depressive symptoms? Meta-analysis and meta-regression. Psychological medicine, 37(9), 1217-1228.
65	35	Dupont WD, Page DL. Menopausal estrogen replacement therapy and breast cancer. Arch Intern Med 1991;151.67-72.
66	35	Reynolds, K., Lewis, B., Nolen, J. D. L., Kinney, G. L., Sathya, B., & He, J. (2003). Alcohol consumption and risk of stroke: a meta-analysis. Jama, 289(5), 579-588.
67	36	De Boer, A. G., Taskila, T., Ojajärvi, A., Van Dijk, F. J., & Verbeek, J. H. (2009). Cancer survivors and unemployment: a meta-analysis and meta-regression. Jama, 301(7), 753-762.
68	36	Cappuccio, F. P., Taggart, F. M., Kandala, N. B., Currie, A., Peile, E., Stranges, S., & Miller, M. A. (2008). Meta-analysis of short sleep duration and obesity in children and adults. Sleep, 31(5), 619-626.
69	39	Delgado-Rodnguez M, Sillero-Arenas M, Rodriguez-Contreras R, et al. Oral contraceptives and breast cancer. A meta-analysis. Rev Epidemiol Sante Publique 1991;39: 165-81.
70	40	Berger, W., Coutinho, E. S. F., Figueira, I., Marques-Portella, C., Luz, M. P., Neylan, T. C., ... & Mendlowicz, M. V. (2012). Rescuers at risk: a systematic review and meta-regression analysis of the worldwide current prevalence and correlates of PTSD in rescue workers. Social psychiatry and psychiatric epidemiology, 47(6), 1001-1011.
71	45	Livesey, G., Taylor, R., Hulshof, T., & Howlett, J. (2008). Glycemic response and health—a systematic review and meta-analysis: relations between dietary glycemic properties and health outcomes. The American journal of clinical nutrition, 87(1), 258S-268S.
72	49	Garg, A. X., Suri, R. S., Barrowman, N., Rehman, F., Matsell, D., Rosas-Arellano, M. P., ... & Clark, W. F. (2003). Long-term renal prognosis of diarrhea-associated hemolytic uremic syndrome: a systematic review, meta-analysis, and meta-regression. Jama, 290(10), 1360-1370.
73	52	Geddes, J., Freemantle, N., Harrison, P., & Bebbington, P. (2000). Atypical antipsychotics in the treatment of schizophrenia: systematic overview and meta-regression analysis. Bmj, 321(7273), 1371-1376.
74	54	Sherrington, C., Tiedemann, A., Fairhall, N., Close, J. C., & Lord, S. R. (2011). Exercise to prevent falls in older adults: an updated meta-analysis and best practice recommendations. New South Wales public health bulletin, 22(4), 78-83.
75	55	Barth, J., Bermetz, L., Heim, E., Trelle, S., & Tonia, T. (2013). The current prevalence of child sexual abuse worldwide: a systematic review and meta-analysis. International journal of public health, 58(3), 469-483.
76	81	Stone, E. G., Morton, S. C., Hulscher, M. E., Maglione, M. A., Roth, E. A., Grimshaw, J. M., ... & Shekelle, P. G. (2002). Interventions that increase use of adult immunization and cancer screening services: a meta-analysis. Annals of internal medicine, 136(9), 641-651.
77	93	Cornelissen, V. A., & Smart, N. A. (2013). Exercise training for blood pressure: a systematic review and meta‐analysis. Journal of the American Heart Association, 2(1), e004473.
78	98	Kempton, M. J., Geddes, J. R., Ettinger, U., Williams, S. C., & Grasby, P. M. (2008). Meta-analysis, database, and meta-regression of 98 structural imaging studies in bipolar disorder. Archives of general psychiatry, 65(9), 1017-1032.
79	100	Kasiske, B. L., Kalil, R. S., Ma, J. Z., Liao, M., & Keane, W. F. (1993). Effect of antihypertensive therapy on the kidney in patients with diabetes: a meta-regression analysis. Annals of internal medicine, 118(2), 129-138.
80	109	Fazel, S., & Seewald, K. (2012). Severe mental illness in 33 588 prisoners worldwide: systematic review and meta-regression analysis. The British Journal of Psychiatry, 200(5), 364-373.
81	111	Santesso, N., Akl, E. A., Bianchi, M., Mente, A., Mustafa, R., Heels-Ansdell, D., & Schünemann, H. J. (2012). Effects of higher-versus lower-protein diets on health outcomes: a systematic review and meta-analysis. European journal of clinical nutrition, 66(7), 780.
82	111	Thein, H. H., Yi, Q., Dore, G. J., & Krahn, M. D. (2008). Estimation of stage‐specific fibrosis progression rates in chronic hepatitis C virus infection: a meta-analysis and meta-regression. Hepatology, 48(2), 418-431.
83	122	Michie, S., Abraham, C., Whittington, C., McAteer, J., & Gupta, S. (2009). Effective techniques in healthy eating and physical activity interventions: a meta-regression. Health Psychology, 28(6), 690.
84	128	Swannell, S. V., Martin, G. E., Page, A., Hasking, P., & St John, N. J. (2014). Prevalence of nonsuicidal self‐injury in nonclinical samples: Systematic review, meta‐analysis and meta‐regression. Suicide and Life‐Threatening Behavior, 44(3), 273-303.
85	135	Polanczyk, G. V., Willcutt, E. G., Salum, G. A., Kieling, C., & Rohde, L. A. (2014). ADHD prevalence estimates across three decades: an updated systematic review and meta-regression analysis. International journal of epidemiology, 43(2), 434-442.
86	137	Jike, M., Itani, O., Watanabe, N., Buysse, D. J., & Kaneita, Y. (2018). Long sleep duration and health outcomes: A systematic review, meta-analysis and meta-regression. Sleep Medicine Reviews, 39, 25-36.
87	153	Itani, O., Jike, M., Watanabe, N., & Kaneita, Y. (2017). Short sleep duration and health outcomes: a systematic review, meta-analysis, and meta-regression. Sleep medicine, 32, 246-256.
88	156	Corrao, G., Bagnardi, V., Zambon, A., & La Vecchia, C. (2004). A meta-analysis of alcohol consumption and the risk of 15 diseases. Preventive medicine, 38(5), 613-619.
89	161	Steel, Z., Chey, T., Silove, D., Marnane, C., Bryant, R. A., & Van Ommeren, M. (2009). Association of torture and other potentially traumatic events with mental health outcomes among populations exposed to mass conflict and displacement: a systematic review and meta-analysis. Jama, 302(5), 537-549.
90	174	Steel, Z., Marnane, C., Iranpour, C., Chey, T., Jackson, J. W., Patel, V., & Silove, D. (2014). The global prevalence of common mental disorders: a systematic review and meta-analysis 1980–2013. International journal of epidemiology, 43(2), 476-493.
91	221	Renehan, A. G., Tyson, M., Egger, M., Heller, R. F., & Zwahlen, M. (2008). Body-mass index and incidence of cancer: a systematic review and meta-analysis of prospective observational studies. The Lancet, 371(9612), 569-578.
92	271	Sagoe, D., Molde, H., Andreassen, C. S., Torsheim, T., & Pallesen, S. (2014). The global epidemiology of anabolic-androgenic steroid use: a meta-analysis and meta-regression analysis. Annals of epidemiology, 24(5), 383-398.
93	321	Simpson, S., Blizzard, L., Otahal, P., Van der Mei, I., & Taylor, B. (2011). Latitude is significantly associated with the prevalence of multiple sclerosis: a meta-analysis. Journal of Neurology, Neurosurgery & Psychiatry, 82(10), 1132-1141.
94	570	Schwaederle, M., Zhao, M., Lee, J. J., Eggermont, A. M., Schilsky, R. L., Mendelsohn, J., ... & Kurzrock, R. (2015). Impact of precision medicine in diverse cancers: a meta-analysis of phase II clinical trials. Journal of clinical oncology, 33(32), 3817.

## Sheet: econ
Number	Sample size	Citation, using ["meta-analysis" "meta-regression" economic]
1	885	Abdullah, A., Doucouliagos, H., & Manning, E. (2015). Does education reduce income inequality? A meta-regression analysis. Journal of Economic Surveys, 29(2), 301-316.
2	169	Alptekin, A., & Levine, P. (2012). Military expenditure and economic growth: A meta-analysis. European Journal of Political Economy, 28(4), 636-650.
3	101	Barrio, M., & Loureiro, M. L. (2010). A meta-analysis of contingent valuation forest studies. Ecological Economics, 69(5), 1023-1030.
4	449	Baskaran, T., Feld, L. P., & Schnellenbach, J. (2016). Fiscal Federalism, Decentralization, and Economic Growth: A Meta‐Analysis. Economic Inquiry, 54(3), 1445-1463.
5	66	Bel, G., & Fageda, X. (2009). Factors explaining local privatization: a meta-regression analysis. Public Choice, 139(1-2), 105-119.
6	46	Bel, G., Fageda, X., & Warner, M. E. (2010). Is private production of public services cheaper than public production? A meta‐regression analysis of solid waste and water services. Journal of Policy Analysis and Management, 29(3), 553-577.
7	32	Bellavance, F., Dionne, G., & Lebeau, M. (2009). The value of a statistical life: A meta-analysis with a mixed effects regression model. Journal of health economics, 28(2), 444-464.
8	989	Benos, N., & Zotou, S. (2014). Education and economic growth: A meta-regression analysis. World Development, 64, 669-689.
9	215	Brander, L. M., Florax, R. J., & Vermaat, J. E. (2006). The empirics of wetland valuation: a comprehensive summary and a meta-analysis of the literature. Environmental and Resource Economics, 33(2), 223-250.
10	100	Brander, L. M., Van Beukering, P., & Cesar, H. S. (2007). The recreational value of coral reefs: a meta-analysis. Ecological Economics, 63(1), 209-218.
11	66	Brander, L., Brouwer, R., & Wagtendonk, A. (2013). Economic valuation of regulating services provided by wetlands in agricultural landscapes: A meta-analysis. Ecological Engineering, 56, 89-96.
12	222	Brons, M., Nijkamp, P., Pels, E., Rietveld, P., 2008. A meta-analysis of the price elasticity of gasoline demand. A SUR approach. Energy Econ. 30 (5), 2105–2122.
13	90	Brons, M., Nijkamp, P., Pels, E., Rietveld, P., 2008. A meta-analysis of the price elasticity of gasoline demand. A SUR approach. Energy Econ. 30 (5), 2105–2122.
14	204	Brons, M., Pels, E., Nijkamp, P., & Rietveld, P. (2002). Price elasticities of demand for passenger air travel: a meta-analysis. Journal of Air Transport Management, 8(3), 165-175.
15	441	Bumann, S., Hermes, N., & Lensink, R. (2013). Financial liberalization and economic growth: A meta-analysis. Journal of International Money and Finance, 33, 255-281.
16	22	Button, K., & Kerr, J. (1996). The effectiveness of traffic restraint policies: a simple meta-regression analysis. International Journal of Transport Economics/Rivista internazionale di economia dei trasporti, 213-225.
17	2959	Campos, N. F., Fidrmuc, J., & Korhonen, I. (2019). Business cycle synchronisation and currency unions: A review of the econometric evidence using meta-analysis. International Review of Financial Analysis, 61, 274-283.
18	379	Chaikumbung, M., Doucouliagos, H., & Scarborough, H. (2016). The economic value of wetlands in developing countries: A meta-regression analysis. Ecological Economics, 124, 164-174.
19	174	Chen, P. Y., Chen, S. T., & Chen, C. C. (2012). Energy consumption and economic growth—New evidence from meta analysis. Energy policy, 44, 245-255.
20	1827	Cipollina, M., & Salvatici, L. (2010). Reciprocal trade agreements in gravity models: A meta-analysis. Review of International Economics, 18(1), 63-80.
21	835	Ćorić, B., & Pugh, G. (2010). The effects of exchange rate variability on international trade: a meta-regression analysis. Applied Economics, 42(20), 2631-2644.
22	314	Dalhuisen, J. M., Florax, R. J., De Groot, H. L., & Nijkamp, P. (2003). Price and income elasticities of residential water demand: a meta-analysis. Land economics, 79(2), 292-308.
23	162	Dalhuisen, J. M., Florax, R. J., De Groot, H. L., & Nijkamp, P. (2003). Price and income elasticities of residential water demand: a meta-analysis. Land economics, 79(2), 292-308.
24	407	De Dominicis, L., Florax, R. J., & De Groot, H. L. (2008). A meta‐analysis on the relationship between income inequality and economic growth. Scottish Journal of Political Economy, 55(5), 654-682.
25	236	de Linde Leonard, M., Stanley, T. D., & Doucouliagos, H. (2014). Does the UK minimum wage reduce employment? A meta‐regression analysis. British Journal of Industrial Relations, 52(3), 499-520.
26	57	Debrezion, G., Pels, E., & Rietveld, P. (2007). The impact of railway stations on residential and commercial property value: a meta-analysis. The Journal of Real Estate Finance and Economics, 35(2), 161-180.
27	156	Delmas, M. A., Fischlein, M., & Asensio, O. I. (2013). Information strategies and energy conservation behavior: A meta-analysis of experimental studies from 1975 to 2012. Energy Policy, 61, 729-739.
28	300	Dimos, C., & Pugh, G. (2016). The effectiveness of R&D subsidies: A meta-regression analysis of the evaluation literature. Research Policy, 45(4), 797-815.
29	360	Dimos, C., & Pugh, G. (2016). The effectiveness of R&D subsidies: A meta-regression analysis of the evaluation literature. Research Policy, 45(4), 797-815.
30	239	Dimos, C., & Pugh, G. (2016). The effectiveness of R&D subsidies: A meta-regression analysis of the evaluation literature. Research Policy, 45(4), 797-815.
31	225	Dobson, S., Ramlogan, C., & Strobl, E. (2006). Why do rates of β‐convergence differ? A meta‐regression analysis. Scottish Journal of Political Economy, 53(2), 153-173.
32	254	Dobson, S., Ramlogan, C., & Strobl, E. (2006). Why do rates of β‐convergence differ? A meta‐regression analysis. Scottish Journal of Political Economy, 53(2), 153-173.
33	73	Doucouliagos, C., & Laroche, P. (2003). What do unions do to productivity? A meta‐analysis. Industrial Relations: A Journal of Economy and Society, 42(4), 650-691.
34	532	Doucouliagos, H., & Laroche, P. (2009). Unions and Profits: A Meta-Regression Analysis. Industrial Relations: A Journal of Economy and Society, 48(1), 146-184.
35	64	Doucouliagos, H., & Stanley, T. D. (2009). Publication selection bias in minimum-wage research? A meta-regression analysis. British Journal of Industrial Relations, 47(2), 406-428.
36	112	Efendic, A., Pugh, G., & Adnett, N. (2011). Institutions and economic performance: A meta-regression analysis. European Journal of Political Economy, 27(3), 586-599.
37	277	Espey, M., 1998. Gasoline demand revisited: an international meta-analysis of elasticities. Energy Econ. 20 (3), 273–295.
38	245	Espey, M., 1998. Gasoline demand revisited: an international meta-analysis of elasticities. Energy Econ. 20 (3), 273–295.
39	363	Espey, M., 1998. Gasoline demand revisited: an international meta-analysis of elasticities. Energy Econ. 20 (3), 273–295.
40	345	Espey, M., 1998. Gasoline demand revisited: an international meta-analysis of elasticities. Energy Econ. 20 (3), 273–295.
41	124	Espey, M., Espey, J., & Shaw, W. D. (1997). Price elasticity of residential demand for water: A meta‐analysis. Water resources research, 33(6), 1369-1374.
42	453	Fidrmuc, J., & Korhonen, I. (2006). Meta-analysis of the business cycle correlation between the euro area and the CEECs. Journal of Comparative Economics, 34(3), 518-537.
43	43	Florax, R. J., Travisi, C. M., & Nijkamp, P. (2005). A meta-analysis of the willingness to pay for reductions in pesticide risk exposure. European Review of Agricultural Economics, 32(4), 441-467.; where N is the number of values used in analyses, not their reported n from original analyses
44	1172	Gallet, C. A. (2007). The demand for alcohol: a meta-analysis of elasticities. Australian Journal of Agricultural and Resource Economics, 51(2), 121-135.
45	1014	Gallet, C. A. (2007). The demand for alcohol: a meta-analysis of elasticities. Australian Journal of Agricultural and Resource Economics, 51(2), 121-135.
46	322	Gallet, C. A. (2007). The demand for alcohol: a meta-analysis of elasticities. Australian Journal of Agricultural and Resource Economics, 51(2), 121-135.
47	523	Gallet, C. A., & List, J. A. (2003). Cigarette demand: a meta-analysis of elasticities. Health economics, 12(10), 821-835.
48	375	Gallet, C. A., & List, J. A. (2003). Cigarette demand: a meta-analysis of elasticities. Health economics, 12(10), 821-835.
49	137	Gallet, C. A., & List, J. A. (2003). Cigarette demand: a meta-analysis of elasticities. Health economics, 12(10), 821-835.
50	74	García-Quevedo, J. (2004). Do public subsidies complement business R&D? A meta‐analysis of the econometric evidence. Kyklos, 57(1), 87-102.
51	746	Gechert, S. (2015). What fiscal policy is most effective? A meta-regression analysis. Oxford Economic Papers, 67(3), 553-580.
52	1063	Gechert, S. (2015). What fiscal policy is most effective? A meta-regression analysis. Oxford Economic Papers, 67(3), 553-580.
53	766	Gechert, S. (2015). What fiscal policy is most effective? A meta-regression analysis. Oxford Economic Papers, 67(3), 553-580.
54	418	Ghermandi, A., Van Den Bergh, J. C., Brander, L. M., de Groot, H. L., & Nunes, P. A. (2010). Values of natural and human‐made wetlands: A meta‐analysis. Water Resources Research, 46(12).
55	831	Havranek, T., & Kokes, O. (2015). Income elasticity of gasoline demand: A meta-analysis. Energy Economics, 47, 77-86.
56	346	Havranek, T., & Kokes, O. (2015). Income elasticity of gasoline demand: A meta-analysis. Energy Economics, 47, 77-86.
57	110	Havranek, T., Irsova, Z., 2012. Survey article: publication bias in the literature on foreign direct investment spillovers. J. Dev. Stud. 48 (10), 1375–1396.
58	92	Havranek, T., Irsova, Z., 2012. Survey article: publication bias in the literature on foreign direct investment spillovers. J. Dev. Stud. 48 (10), 1375–1396.
59	471	Headey, D. D., & Hodge, A. (2009). The effect of population growth on economic growth: A meta-regression analysis of the macroeconomic literature. Population and Development Review, 35(2), 221-248.
60	1033	Heinemann, F., Moessinger, M. D., & Yeter, M. (2018). Do fiscal rules constrain fiscal policy? A meta-regression analysis. European Journal of Political Economy, 51, 69-92.
61	1033	Heinemann, F., Moessinger, M. D., & Yeter, M. (2018). Do fiscal rules constrain fiscal policy? A meta-regression-analysis. European Journal of Political Economy, 51, 69-92.
62	127	Hjerpe, E., Hussain, A., & Phillips, S. (2015). Valuing type and scope of ecosystem conservation: a meta-analysis. Journal of Forest Economics, 21(1), 32-50.
63	37	Horváthová, E. (2010). Does environmental performance affect financial performance? A meta-analysis. Ecological economics, 70(1), 52-59.
64	625	Iwasaki, I., & Tokunaga, M. (2016). Technology transfer and spillovers from FDI in transition economies: A meta-analysis. Journal of Comparative Economics, 44(4), 1086-1114.
65	152	Jarrell, S. B., & Stanley, T. D. (1990). A meta-analysis of the union-nonunion wage gap. ILR Review, 44(1), 54-67.
66	104	Jarrell, S. B., & Stanley, T. D. (2004). Declining bias and gender wage discrimination? A meta-regression analysis. Journal of Human Resources, 39(3), 828-838.
67	365	Jeppesen, T., List, J. A., & Folmer, H. (2002). Environmental regulations and new plant location decisions: evidence from a meta‐analysis. Journal of regional science, 42(1), 19-49.
68	38	Karim, A., & Noy, I. (2016). Poverty and natural disasters: A regression meta-analysis. Review of Economics and Institutions, 7(2), 26.
69	372	Klomp, J., & De Haan, J. (2010). Inflation and central bank independence: a meta‐regression analysis. Journal of Economic Surveys, 24(4), 593-621.
70	662	Klomp, J., & Valckx, K. (2014). Natural disasters and economic growth: A meta-analysis. Global Environmental Change, 26, 183-195.
71	317	Koetse, M. J., De Groot, H. L., & Florax, R. J. (2008). Capital-energy substitution and shifts in factor demand: A meta-analysis. Energy Economics, 30(5), 2236-2251.
72	314	Koetse, M. J., De Groot, H. L., & Florax, R. J. (2008). Capital-energy substitution and shifts in factor demand: A meta-analysis. Energy Economics, 30(5), 2236-2251.
73	90	Kopsch, F. (2016). The cost of aircraft noise–Does it differ from road noise? A meta-analysis. Journal of Air Transport Management, 57, 138-142.
74	47	Kuik, O., Brander, L., & Tol, R. S. (2009). Marginal abatement costs of greenhouse gas emissions: A meta-analysis. Energy policy, 37(4), 1395-1403.
75	49	Kuik, O., Brander, L., & Tol, R. S. (2009). Marginal abatement costs of greenhouse gas emissions: A meta-analysis. Energy policy, 37(4), 1395-1403.
76	106	Lagerkvist, C. J., & Hess, S. (2010). A meta-analysis of consumer willingness to pay for farm animal welfare. European Review of Agricultural Economics, 38(1), 55-78.
77	588	Li, H., Grijalva, T., & Berrens, R. P. (2007). Economic growth and environmental quality: a meta-analysis of environmental Kuznets curve studies. Economics Bulletin, 17(5), 1-11.
78	12	Lundahl, B. W., Kunz, C., Brownell, C., Harris, N., & Van Vleet, R. (2009). Prison privatization: A meta-analysis of cost and quality of confinement indicators. Research on Social Work Practice, 19(4), 383-394.
79	142	Ma, C., Rogers, A. A., Kragt, M. E., Zhang, F., Polyakov, M., Gibson, F., ... & Tapsuwan, S. (2015). Consumers’ willingness to pay for renewable energy: A meta-regression analysis. Resource and Energy Economics, 42, 93-109.
80	12	Meerwijk, E. L., & Sevelius, J. M. (2017). Transgender population size in the United States: a meta-regression of population-based probability samples. American journal of public health, 107(2), e1-e8.
81	729	Melo, P. C., Graham, D. J., & Noland, R. B. (2009). A meta-analysis of estimates of urban agglomeration economies. Regional science and urban Economics, 39(3), 332-342.
82	247	Menegaki, A. N. (2014). On energy consumption and GDP studies; A meta-analysis of the last two decades. Renewable and sustainable energy reviews, 29, 31-36.
83	121	Meyer, K. E., & Sinani, E. (2009). When and where does foreign direct investment generate positive spillovers? A meta-analysis. Journal of International Business Studies, 40(7), 1075-1094.
84	33	Nelson, J. P. (2004). Meta-analysis of airport noise and hedonic property values. Journal of Transport Economics and Policy (JTEP), 38(1), 1-27.
85	184	Oczkowski, E., & Doucouliagos, H. (2015). Wine prices and quality ratings: A meta-regression analysis. American Journal of Agricultural Economics, 97(1), 103-121.
86	75	Peach, E. K., & Stanley, T. D. (2009). Efficiency wages, productivity and simultaneity: A meta-regression analysis. Journal of Labor Research, 30(3), 262-268.
87	277	Phan, T. H. D., Brouwer, R., & Davidson, M. (2014). The economic costs of avoided deforestation in the developing world: a meta-analysis. Journal of forest economics, 20(1), 1-16.
88	59	Phillips, J. M. (1994). Farmer education and farmer efficiency: A meta-analysis. Economic development and cultural change, 43(1), 149-165.
89	69	Phillips, J. M., & Goss, E. P. (1995). The effect of state and local taxes on economic development: A meta-analysis. Southern Economic Journal, 320-333.
90	699	Reynaud, A., & Lanzanova, D. (2017). A global meta-analysis of the value of ecosystem services provided by lakes. Ecological Economics, 137, 184-194.
91	67	Richardson, L., & Loomis, J. (2009). The total economic value of threatened, endangered and rare species: an updated meta-analysis. Ecological Economics, 68(5), 1535-1548.
92	754	Rose, A. K., & Stanley, T. D. (2005). A meta-analysis of the effect of common currencies on international trade. Journal of economic surveys, 19(3), 347-365.
93	145	Salem, M. E., & Mercer, D. E. (2012). The economic value of mangroves: a meta-analysis. Sustainability, 4(3), 359-383.
94	30	Schipper, Y., Nijkamp, P., & Rietveld, P. (1998). Why do aircraft noise value estimates differ? A meta-analysis. Journal of air transport management, 4(2), 117-124.
95	638	Sebri, M. (2014). A meta-analysis of residential water demand studies. Environment, development and sustainability, 16(3), 499-520.
96	72	Sebri, M. (2014). A meta-analysis of residential water demand studies. Environment, development and sustainability, 16(3), 499-520.
97	70	Sebri, M. (2014). A meta-analysis of residential water demand studies. Environment, development and sustainability, 16(3), 499-520.
98	153	Sebri, M. (2015). Use renewables to be cleaner: meta-analysis of the renewable energy consumption–economic growth nexus. Renewable and Sustainable Energy Reviews, 42, 657-665.
99	58	Sirmans, G. S., MacDonald, L., Macpherson, D. A., & Zietz, E. N. (2006). The value of housing characteristics: a meta analysis. The Journal of Real Estate Finance and Economics, 33(3), 215-240.
100	99	Stanley, T. D. (2004). Does unemployment hysteresis falsify the natural rate hypothesis? A meta-regression analysis. Journal of Economic Surveys, 18(4), 589-612.
101	41	Stanley, T. D., & Jarrell, S. B. (1998). Gender wage discrimination bias? A meta-regression analysis. Journal of Human Resources, 947-973.
102	85	Sundt, S., & Rehdanz, K. (2015). Consumers' willingness to pay for green electricity: A meta-analysis of the literature. Energy Economics, 51, 1-8.
103	248	Tingvall, P. G., & Ljungwall, C. (2012). Is China different? A meta-analysis of export-led growth. Economics Letters, 115(2), 177-179.
104	1334	Valickova, P., Havranek, T., & Horvath, R. (2015). Financial development and economic growth: A meta‐analysis. Journal of Economic Surveys, 29(3), 506-526.
105	105	Van Asselen, S., Verburg, P. H., Vermaat, J. E., & Janse, J. H. (2013). Drivers of wetland conversion: a global meta-analysis. PloS one, 8(11), e81292.
106	575	Velickovski, I., & Pugh, G. T. (2011). Constraints on exchange rate flexibility in transition economies: a meta-regression analysis of exchange rate pass-through. Applied Economics, 43(27), 4111-4125.
107	1535	Weichselbaumer, D., & Winter-Ebmer, R. (2005). A meta-analysis of the international gender wage gap. Journal of Economic Surveys, 19(3), 479-511.
108	141	Wooster, R. B., & Diebel, D. S. (2010). Productivity spillovers from foreign direct investment in developing countries: A meta‐regression analysis. Review of Development Economics, 14(3), 640-655.
109	711	Zelmer, J. (2003). Linear public goods experiments: A meta-analysis. Experimental Economics, 6(3), 299-310.
110	167	Zeng, J., Pang, X., Zhang, L., Medina, A., & Rozelle, S. (2014). Gender inequality in education in China: a meta-regression analysis. Contemporary Economic Policy, 32(2), 474-491.
